# Supplementary material for: Cyclohexanedodecol-Assisted Interfacial Engineering for Robust and High-Performance Zinc Metal Anode
Source: PubMed Central journal article supplement (PMC9019003; doi:10.1007/s40820-022-00846-0), 2022-04-19
Supplement: 40820_2022_846_MOESM1_ESM.pdf [file 40820_2022_846_MOESM1_ESM.pdf]

Supporting Information for

## Cyclohexanedodecol-Assisted Interfacial Engineering for Robust and High-Performance Zinc Metal Anode

Zhenzhen Wu<sup>1,†</sup>, Meng Li<sup>1,†</sup>, Yuhui Tian<sup>1</sup>, Hao Chen<sup>1</sup>, Shao-Jian Zhang<sup>2</sup>, Chuang Sun<sup>3</sup>, Chengpeng Li<sup>4</sup>, Milton Kiefel<sup>4</sup>, Chao Lai<sup>3</sup>, Zhan Lin<sup>2,\*</sup>, Shanqing Zhang<sup>1,\*</sup>

<sup>1</sup>Centre for Clean Environment and Energy, Griffith University, Gold Coast 4222, Australia

<sup>2</sup>Guangzhou Key Laboratory of Clean Transportation Energy Chemistry, School of Chemical Engineering and Light Industry, Guangdong University of Technology, Guangzhou 510006, P. R. China

<sup>3</sup>School of Chemistry and Materials Science, Jiangsu Normal University, Xuzhou 221116, P. R. China

<sup>4</sup>Institute for Glycomics, Griffith University, Gold Coast 4222, Australia

†Zhenzhen Wu and Meng Li contributed equally to this work.

\*Correspondence authors. E-mail: [zhanlin@gdut.edu.cn](mailto:zhanlin@gdut.edu.cn) (Z. Lin), [s.zhang@griffith.edu.au](mailto:s.zhang@griffith.edu.au) (S.Q. Zhang)

### Supplementary Figures and Tables

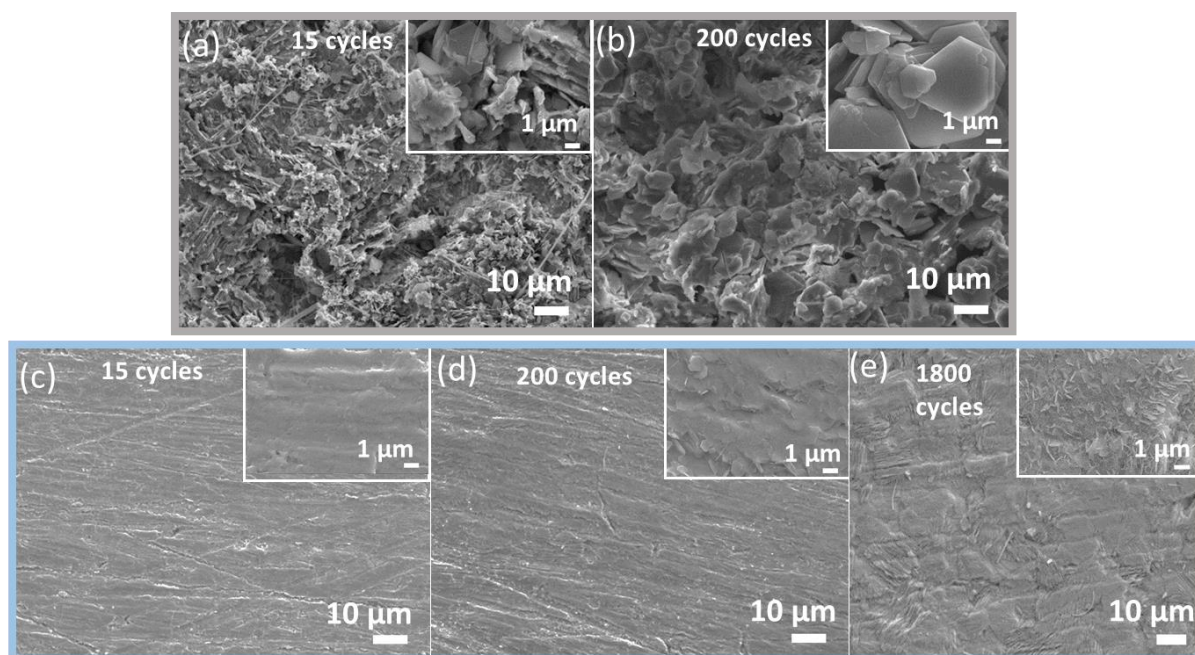

**Fig. S1** The morphologies and of Zn anode after cycling at a capacity of  $1 \text{ mAh cm}^{-2}$  and current density of  $2 \text{ mA cm}^{-2}$  in ZnSO<sub>4</sub> electrolyte (a-b) and ZnSO<sub>4</sub>-CHD electrolyte (c-e): a and c are after 15 cycles, b and d are after 200 h, e is after 1800 h. The bar is 10 μm. Insertion is the magnified image with a scale bar of 1 μm

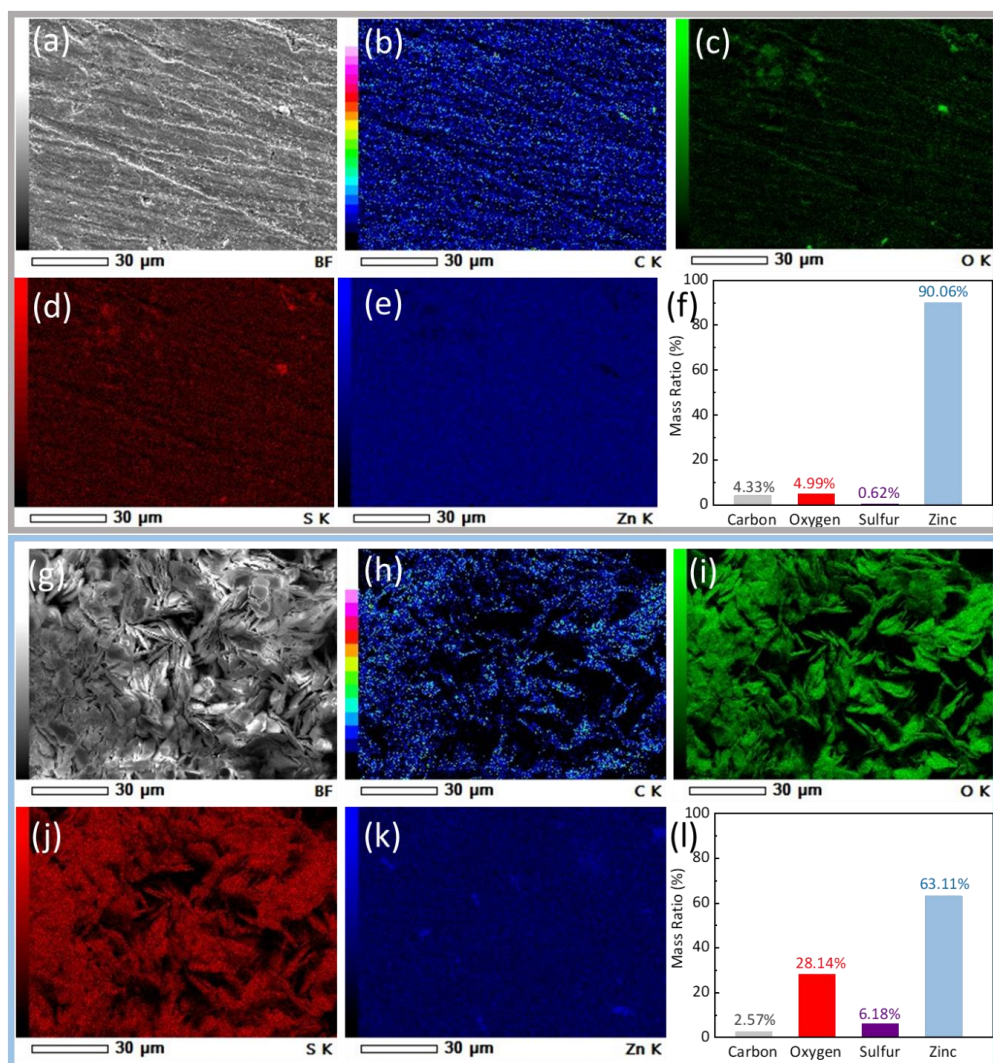

**Fig. S2** Morphology and element analysis of metal Zn anode after 200 cycles at  $1 \text{ mAh cm}^{-2}$  and  $2 \text{ mA cm}^{-2}$ . SEM images of Zn anode in  $\text{ZnSO}_4$ -CHD electrolyte (a) and in  $\text{ZnSO}_4$  electrolyte (c); Elements content of Zn surface by SEM-EDS method in  $\text{ZnSO}_4$ -CHD electrolyte (b) and in  $\text{ZnSO}_4$  electrolyte (d)

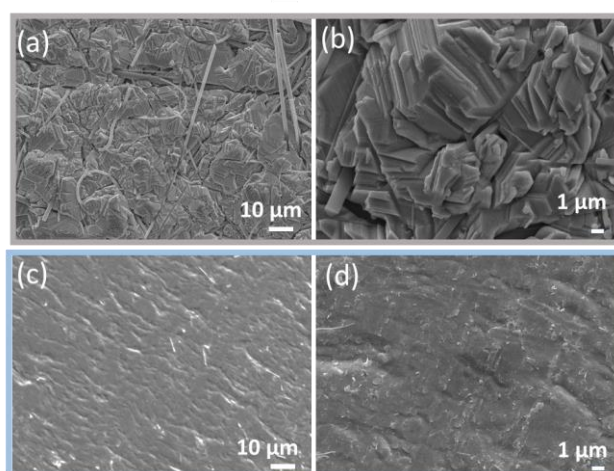

**Fig. S3** Top-view SEM images of Zn deposition on Cu foil at  $2 \text{ mA cm}^{-2}$  for 1 h without (a-b) and with CHD additives (c-d) in  $\text{ZnSO}_4$  aqueous solution.

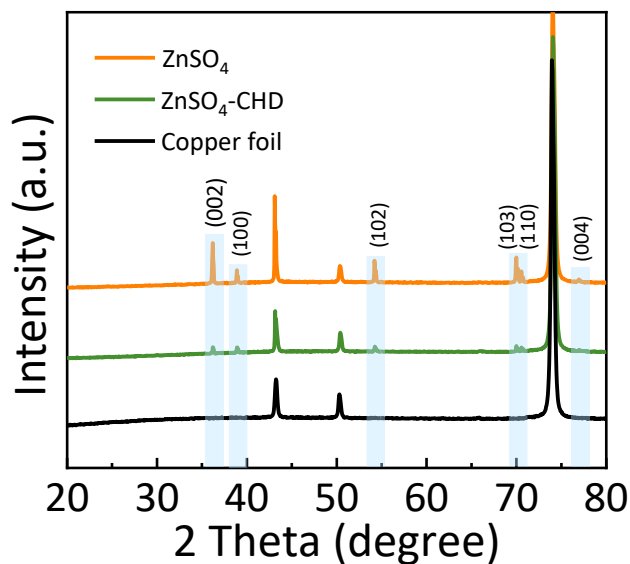

**Fig. S4** XRD patterns of bare copper foil and that after the Zn deposition for 2 hours at  $1\text{ mA cm}^{-2}$ ,  $2\text{ mAh cm}^{-2}$  with and without CHD additives

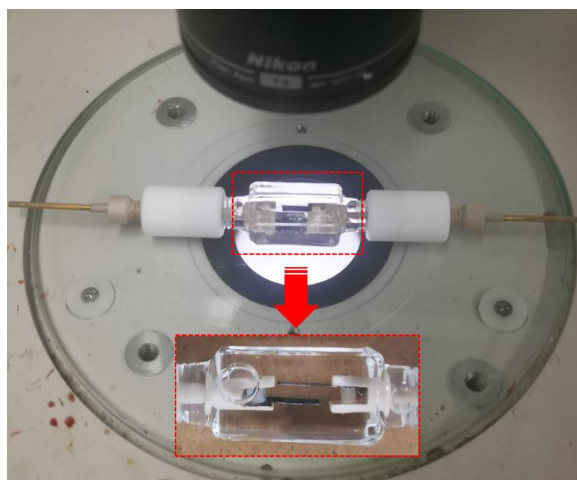

**Fig. S5** The *in-situ* optical microscopy system to observe the Zn anode surface during the constant Zn plating process

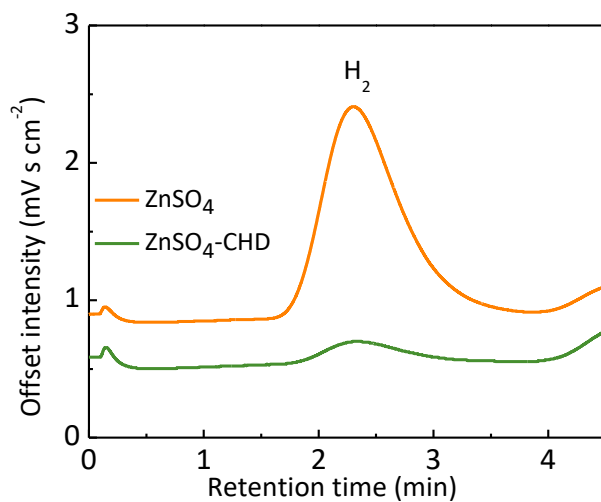

**Fig. S6** *In-situ* EC-GC profiles during plating for 1h at the current density of  $10\text{ mA cm}^{-2}$

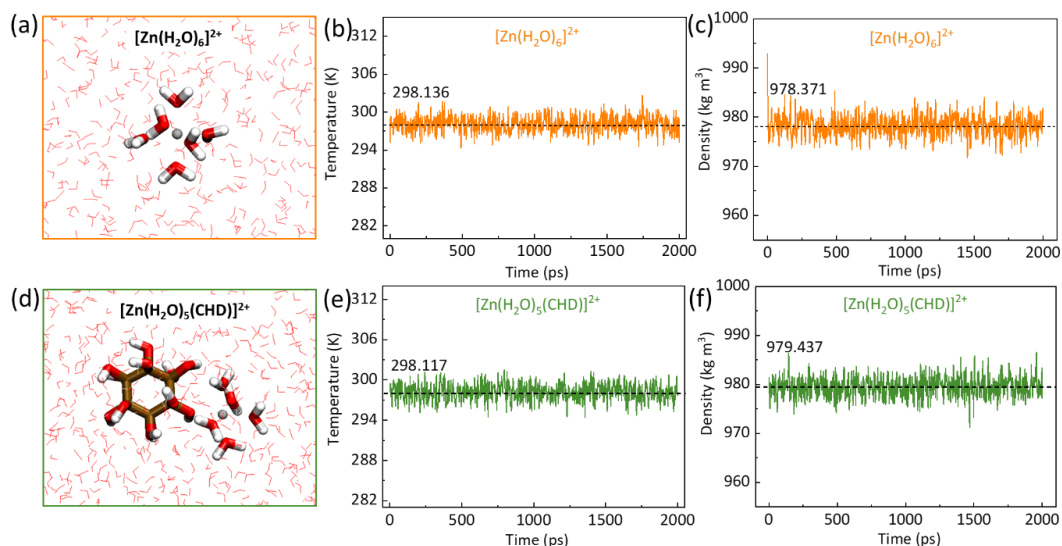

**Fig. S7** The MD simulations at 298.15K and 2000ps of ZnSO<sub>4</sub> system electrolyte (a-c) and ZnSO<sub>4</sub>-CHD system electrolyte (d-f): The snapshot of representative Zn-solvation sheath in the ZnSO<sub>4</sub> system (a) and ZnSO<sub>4</sub>-CHD system (d), the red, white, grey and blue sticks represent oxygen, hydrogen, zinc, and carbon atoms, respectively; The time versus temperature figure in the ZnSO<sub>4</sub> system (b) and ZnSO<sub>4</sub>-CHD system (e); The time versus density figure in the ZnSO<sub>4</sub> system (c) and ZnSO<sub>4</sub>-CHD system (f)

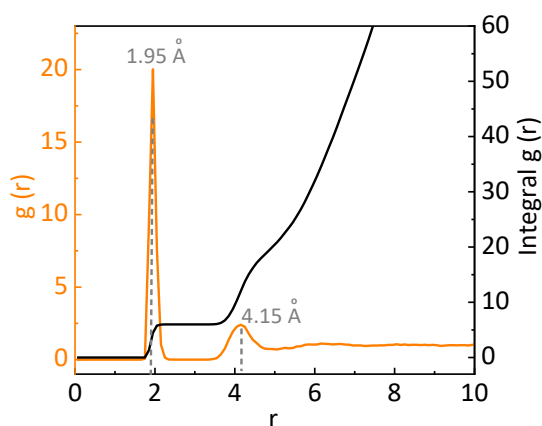

**Fig. S8** The MD simulations at 298.15K and 100ps of Zn<sup>2+</sup>-O (H<sub>2</sub>O) in ZnSO<sub>4</sub> system electrolyte

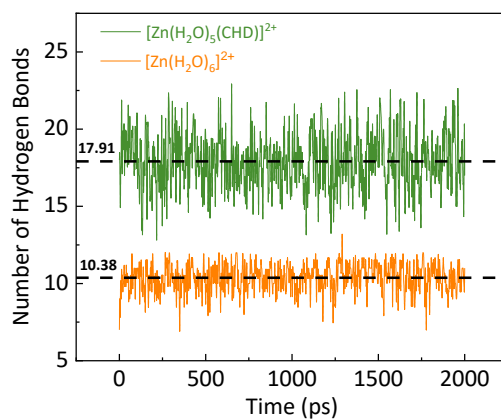

**Fig. S9** The number of hydrogen bonds around the molecular cluster of [Zn(H<sub>2</sub>O)<sub>5</sub>(CHD)]<sup>2+</sup> and [Zn(H<sub>2</sub>O)<sub>6</sub>]<sup>2+</sup> in the electrolyte from the MD simulation

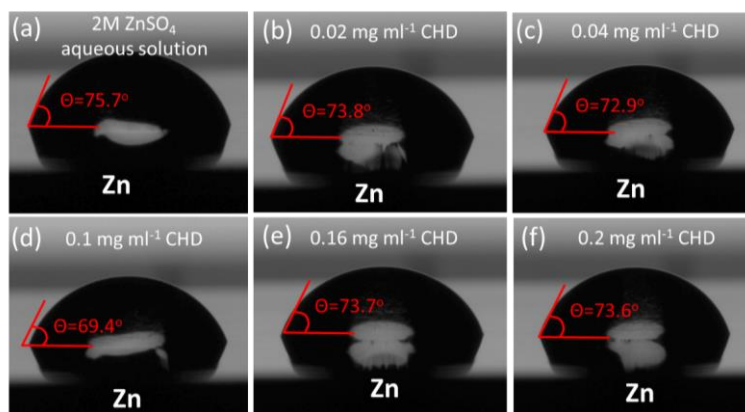

**Fig. S10** Measurements of contact angles after the droplet stable for 3 minutes. Contact angles of electrolytes with blank electrolyte (a),  $0.02\text{mg ml}^{-1}$  (b),  $0.04\text{mg ml}^{-1}$  (c),  $0.1\text{mg ml}^{-1}$  (d),  $0.16\text{mg ml}^{-1}$  (e), and  $0.2\text{ mg ml}^{-1}$  (f) CHD additive on Zinc electrode surface

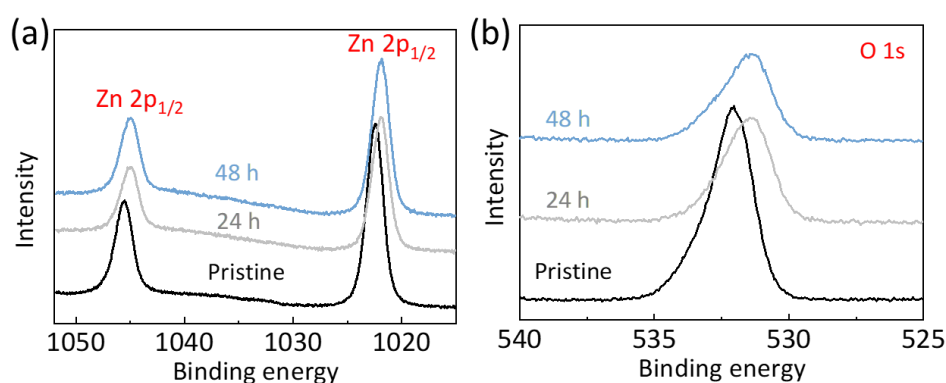

**Fig. S11** The XPS spectra of Zn foil in the pristine state and immersion in CHD-assisted electrolyte for 24 and 48 hours. (a) Zn 2p; (b) O 1s

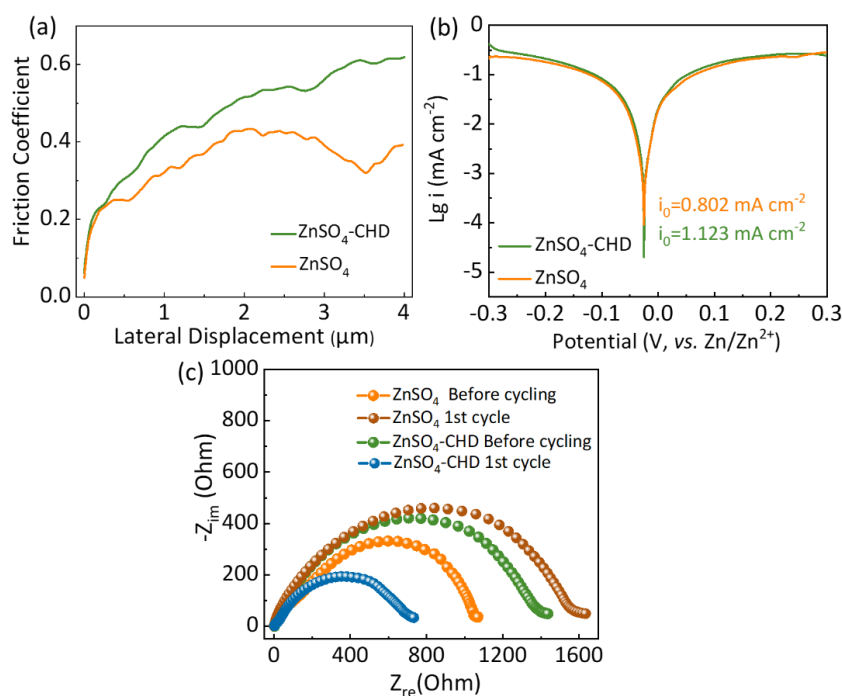

**Fig. S12** (a) Nanoscratch test of copper foil surface in  $\text{ZnSO}_4\text{-CHD}$  and  $\text{ZnSO}_4$  aqueous solution. (b) Tafel curves of Zn/Zn symmetric cells. (c) EIS curves of Zn|Zn symmetric cells before and after 1<sup>st</sup> cycle. The battery was tested at  $1\text{mAh cm}^{-2}$  and  $2\text{mA cm}^{-2}$

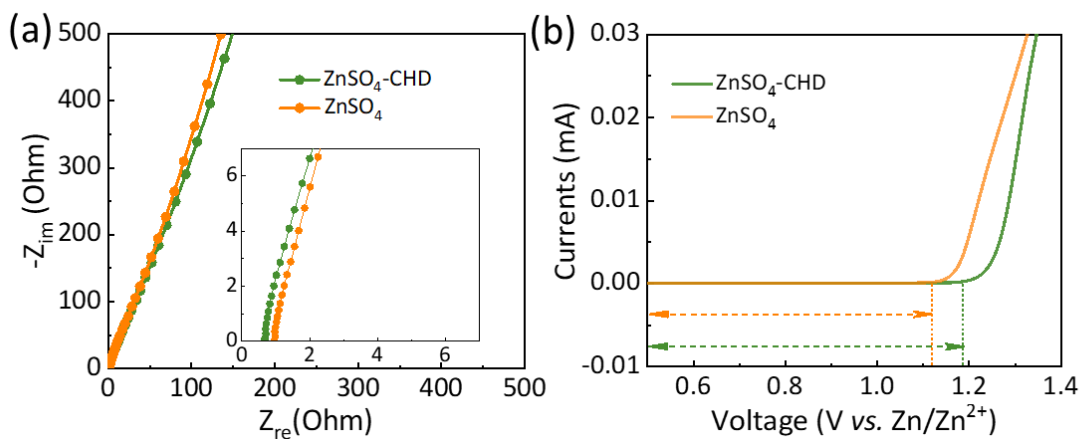

**Fig. S13** (a) EIS of stain steel-stain steel cell in the electrolyte with and without CHD additives. Insertion is the magnified curves of EIS at the high-frequency region. (b) linear sweep voltammetry (LSV) with and without CHD additives in Zn|Cu cells

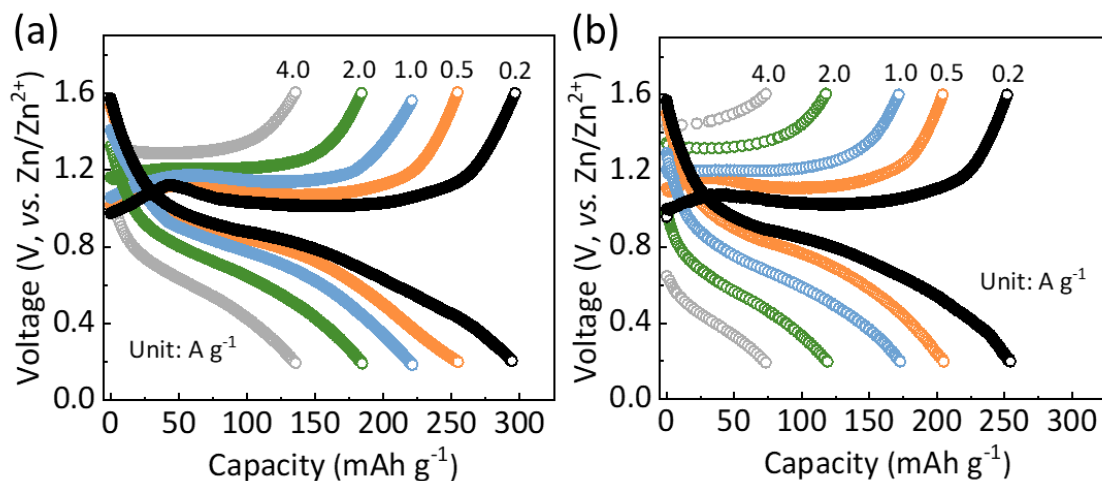

**Fig. S14** (a-b) Charge-discharge profiles of Zn|V<sub>2</sub>O<sub>5</sub> full cell from 0.2 to 4 A g<sup>-1</sup> with (a) and without (b) CHD additives

**Table S1** Comparison of cycling performance for the modified electrolytes with various additives in Zn|Zn symmetric cells

| The modified electrolytes                                                                | Lifespan                                                                                                                                                                            | Refs.     |
|------------------------------------------------------------------------------------------|-------------------------------------------------------------------------------------------------------------------------------------------------------------------------------------|-----------|
| <b>CHD + 2 M ZnSO<sub>4</sub> in H<sub>2</sub>O</b>                                      | 2 mA cm <sup>-2</sup> , 1 mAh cm <sup>-2</sup> for 2200 h<br>5 mA cm <sup>-2</sup> , 1 mAh cm <sup>-2</sup> for 1000 h<br>10 mA cm <sup>-2</sup> , 1 mAh cm <sup>-2</sup> for 650 h | This work |
| <b>1 M Zn(TFSI) + 20 M LiTFSI in H<sub>2</sub>O</b>                                      | 0.2 mA cm <sup>-2</sup> , 0.035 mAh cm <sup>-2</sup> for 170 h                                                                                                                      | [S1]      |
| <b>3 M Zn(CF<sub>3</sub>SO<sub>3</sub>)<sub>2</sub> in H<sub>2</sub>O</b>                | 0.1 mA cm <sup>-2</sup> , 0.1mAh cm <sup>-2</sup> for 800 h                                                                                                                         | [S2]      |
| <b>Ti<sub>3</sub>C<sub>2</sub>TX MXene + 2 M ZnSO<sub>4</sub> in H<sub>2</sub>O</b>      | 1 mA cm <sup>-2</sup> , 1 mAh cm <sup>-2</sup> for 500 h                                                                                                                            | [S3]      |
| <b>Glucose + 1 M ZnSO<sub>4</sub> in H<sub>2</sub>O</b>                                  | 1 mA cm <sup>-2</sup> , 1 mAh cm <sup>-2</sup> for 2000 h                                                                                                                           | [S4]      |
| <b>DMSO + 1.6 M ZnCl<sub>2</sub> in H<sub>2</sub>O</b>                                   | 0.5 mA cm <sup>-2</sup> , 0.5 mAh cm <sup>-2</sup> for 1000 h                                                                                                                       | [S5]      |
| <b>PAM + 1 M ZnSO<sub>4</sub> + 0.5 M Na<sub>2</sub>SO<sub>4</sub> in H<sub>2</sub>O</b> | 1 mA cm <sup>-2</sup> , 1 mAh cm <sup>-2</sup> for 180 h                                                                                                                            | [S6]      |
| <b>Diethyl ether + 3M Zn(CF<sub>3</sub>SO<sub>3</sub>)<sub>2</sub> in H<sub>2</sub>O</b> | 0.2 mA cm <sup>-2</sup> , 0.2 mAh cm <sup>-2</sup> for 250 h                                                                                                                        | [S7]      |
| <b>Zn(ClO<sub>4</sub>)<sub>2</sub>*6H<sub>2</sub>O in SN</b>                             | 0.05 mA cm <sup>-2</sup> , 0.5 mAh cm <sup>-2</sup> for 800 h                                                                                                                       | [S8]      |
| <b>0.5 M ZnTFMS in DMF</b>                                                               | 1 mA cm <sup>-2</sup> , 1 mAh cm <sup>-2</sup> for 2800 h                                                                                                                           | [S9]      |

**Table S2** Comparison of the electrochemical performance in Zn|V<sub>2</sub>O<sub>5</sub> full cells

| V <sub>2</sub> O <sub>5</sub> mass loading | Electrolyte                                                                             | Specific capacity                                      | Cycling stability                           | Refs.            |
|--------------------------------------------|-----------------------------------------------------------------------------------------|--------------------------------------------------------|---------------------------------------------|------------------|
| <b>ca. 5.0 mg cm<sup>-2</sup></b>          | <b>CHD + 2 M ZnSO<sub>4</sub> in H<sub>2</sub>O</b>                                     | <b>300 mAh g<sup>-1</sup> (200 mA g<sup>-1</sup>)</b>  | <b>2000 cycles (2 A g<sup>-1</sup>)</b>     | <b>This work</b> |
| <b>2.5 mg cm<sup>-2</sup></b>              | <b>3 M Zn(CF<sub>3</sub>SO<sub>3</sub>)<sub>2</sub> in H<sub>2</sub>O</b>               | <b>381 mAh g<sup>-1</sup> (60 mA g<sup>-1</sup>)</b>   | <b>950 cycles (6 A g<sup>-1</sup>)</b>      | <b>[S10]</b>     |
| <b>N/A</b>                                 | <b>3 M ZnSO<sub>4</sub> in H<sub>2</sub>O</b>                                           | <b>224 mAh g<sup>-1</sup> (100 mA g<sup>-1</sup>)</b>  | <b>400 cycles (2 A g<sup>-1</sup>)</b>      | <b>[S11]</b>     |
| <b>N/A</b>                                 | <b>21 M LiTFSI + 1 M Zn(CF<sub>3</sub>SO<sub>3</sub>)<sub>2</sub> in H<sub>2</sub>O</b> | <b>238 mAh g<sup>-1</sup> (50 mA g<sup>-1</sup>)</b>   | <b>2000 cycles (2 A g<sup>-1</sup>)</b>     | <b>[S12]</b>     |
| <b>3.2 mg cm<sup>-2</sup></b>              | <b>0.5 M Zn(TFSI)<sub>2</sub> in AN</b>                                                 | <b>196 mAh g<sup>-1</sup> (14.4 mA g<sup>-1</sup>)</b> | <b>120 cycles (14.4 mA g<sup>-1</sup>)</b>  | <b>[S13]</b>     |
| <b>5-7 mg cm<sup>-2</sup></b>              | <b>1 M ZnSO<sub>4</sub> in H<sub>2</sub>O</b>                                           | <b>260 mAh g<sup>-1</sup> (2400 mA g<sup>-1</sup>)</b> | <b>1000 cycles (2400 mA g<sup>-1</sup>)</b> | <b>[S14]</b>     |
| <b>0.9-1.2 mg cm<sup>-2</sup></b>          | <b>2 M ZnSO<sub>4</sub> in H<sub>2</sub>O</b>                                           | <b>470 mAh g<sup>-1</sup> (500 mA g<sup>-1</sup>)</b>  | <b>1000 cycles (10 A g<sup>-1</sup>)</b>    | <b>[S15]</b>     |
| <b>1.0 mg cm<sup>-2</sup></b>              | <b>Ti<sub>3</sub>C<sub>2</sub>TX MXene + 2 M ZnSO<sub>4</sub> in H<sub>2</sub>O</b>     | <b>390 mAh g<sup>-1</sup> (200 mA g<sup>-1</sup>)</b>  | <b>300 cycles (1 A g<sup>-1</sup>)</b>      | <b>[S3]</b>      |

## Supplementary References

- [S1] F. Wang, O. Borodin, T. Gao, X. Fan, W. Sun et al., Highly reversible zinc metal anode for aqueous batteries. *Nat. Mater.* **17**(6), 543-549 (2018).  
<https://doi.org/10.1038/s41563-018-0063-z>

- [S2] N. Zhang, F. Cheng, Y. Liu, Q. Zhao, K. Lei et al., Cation-deficient spinel  $\text{ZnMn}_2\text{O}_4$  cathode in  $\text{Zn}(\text{CF}_3\text{SO}_3)_2$  electrolyte for rechargeable aqueous Zn-ion battery. *J. Am. Chem. Soc.* **138**(39), 12894-12901 (2016). <https://doi.org/10.1021/jacs.6b05958>
- [S3] C. Sun, C. Wu, X. Gu, C. Wang, Q. Wang, Interface engineering via  $\text{Ti}_3\text{C}_2\text{T}_x$  MXene electrolyte additive toward dendrite-free zinc deposition. *Nano-Micro Lett.* **13**, 89 (2021). <https://doi.org/10.1007/s40820-021-00612-8>
- [S4] P. Sun, L. Ma, W. Zhou, M. Qiu, Z. Wang et al., Simultaneous regulation on solvation shell and electrode interface for dendrite-free Zn ion batteries: achieved by a low-cost glucose additive. *Angew. Chem. Int. Ed.* **133**(33), 18395-18403 (2021). <https://doi.org/10.1002/anie.202105756>
- [S5] L. Cao, D. Li, E. Hu, J. Xu, T. Deng et al., Solvation structure design for aqueous Zn metal batteries. *J. Am. Chem. Soc.* **142**(51), 21404-21409 (2020). <https://doi.org/10.1021/jacs.0c09794>
- [S6] Q. Zhang, J. Luan, L. Fu, S. Wu, Y. Tang et al., The three-dimensional dendrite-free zinc anode on a copper mesh with a zinc-oriented polyacrylamide electrolyte additive. *Angew. Chem. Int. Ed.* **58**(44), 15841-15847 (2019). <https://doi.org/10.1002/ange.201907830>
- [S7] W. Xu, K. Zhao, W. Huo, Y. Wang, G. Yao et al., Diethyl ether as self-healing electrolyte additive enabled long-life rechargeable aqueous zinc ion batteries. *Nano Energy* **62**, 275-281 (2019). <https://doi.org/10.1016/j.nanoen.2019.05.042>
- [S8] W. Yang, X. Du, J. Zhao, Z. Chen, J. Li et al., Hydrated eutectic electrolytes with ligand-oriented solvation shells for long-cycling zinc-organic batteries. *Joule* **4**(7), 1557-1574 (2020). <https://doi.org/10.1016/j.joule.2020.05.018>
- [S9] Y. Wang, N. Wang, X. Dong, B. Wang, Z. Guo et al., Zinc-organic battery with a wide operation-temperature window from -70 to 150 °C. *Angew. Chem. Int. Ed.* **59**(34), 14577-14583 (2020). <https://doi.org/10.1002/ange.202005603>
- [S10] M. Yan, P. He, Y. Chen, S. Wang, Q. Wei et al., Water-lubricated intercalation in  $\text{V}_2\text{O}_5 \cdot n\text{H}_2\text{O}$  for high-capacity and high-rate aqueous rechargeable zinc batteries. *Adv. Mater.* **30**(1), 1703725 (2018). <https://doi.org/10.1002/adma.201703725>
- [S11] J. Zhou, L. Shan, Z. Wu, X. Guo, G. Fang et al., Investigation of  $\text{V}_2\text{O}_5$  as a low-cost rechargeable aqueous zinc ion battery cathode. *Chem. Commun.* **54**(35), 4457-4460 (2018). <https://doi.org/10.1039/C8CC02250J>
- [S12] P. Hu, M. Yan, T. Zhu, X. Wang, X. Wei et al., Zn/ $\text{V}_2\text{O}_5$  aqueous hybrid-ion battery with high voltage platform and long cycle life. *ACS Appl. Mater. Interfaces* **9**(49), 42717-42722 (2017). <https://doi.org/10.1021/acsami.7b13110>
- [S13] P. Senguttuvan, S.D. Han, S. Kim, A.L. Lipson, S. Tepavcevic et al., A high power rechargeable nonaqueous multivalent Zn/ $\text{V}_2\text{O}_5$  battery. *Adv. Energy Mater.* **6**(24), 1600826 (2016). <https://doi.org/10.1002/aenm.201600826>
- [S14] D. Kundu, B.D. Adams, V. Duffort, S.H. Vajargah, L.F. Nazar, A high-capacity and long-life aqueous rechargeable zinc battery using a metal oxide intercalation cathode. *Nat. Energy* **1**(10), 16119 (2016). <https://doi.org/10.1038/nenergy.2016.119>



- [S15] Y. Yang, Y. Tang, G. Fang, L. Shan, J. Guo et al., Li<sup>+</sup> intercalated V<sub>2</sub>O<sub>5</sub>·nH<sub>2</sub>O with enlarged layer spacing and fast ion diffusion as an aqueous zinc-ion battery cathode. *Energy Environ. Sci.* **11**(11), 3157-3162 (2018). <https://doi.org/10.1039/C8EE01651H>
